# Supplementary material
Source: Springer Nature journal article supplement (https://www.springermedizin.de/resource/supplementary/13099_2010_42_MOESM5_ESM.pdf/9665388)

\*\*\*  $P < 0.001$  versus *P. fluorescens* MF37  
###  $P < 0.001$  versus *P. fluorescens* MFN1032

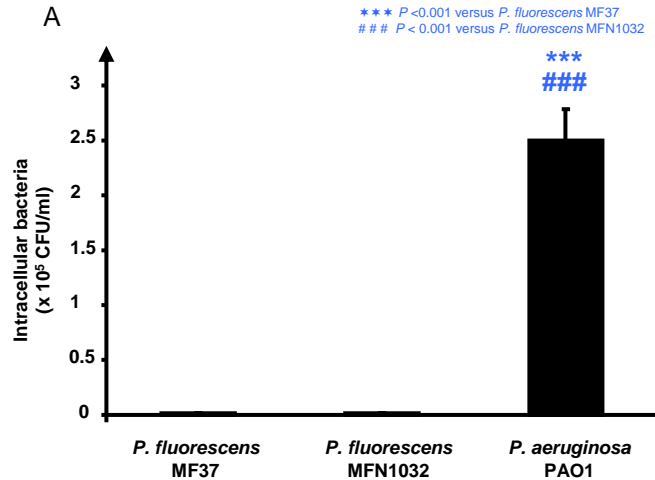

\*  $P < 0.05$  versus *P. fluorescens* MF37  
□  $P < 0.05$  versus *P. aeruginosa* PAO1

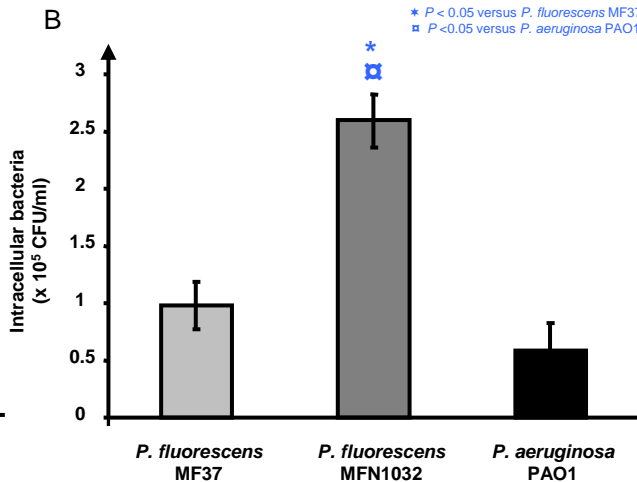

Supplement: MOESM5 [file 9665388]
